# Supplementary material for: Modulation of Lipoteichoic Acids and Exopolysaccharides Prevents Streptococcus mutans Biofilm Accumulation
Source: PubMed Central journal article supplement (PMC7249192; doi:10.3390/molecules25092232), 2020-05-09
Supplement: molecules-25-02232-s001.pdf [file molecules-25-02232-s001.pdf]

# Modulation of lipoteichoic acids and exopolysaccharides prevents *Streptococcus mutans* biofilm accumulation

## Supplementary Information

Tables with tabulated results are presented for Figures depicting graphs in the main document.

**Table S1. Antimicrobial Activity of Myricetin (A) and Compound 1771 (B): data shown in Figure 2 as CFU/mL(log).**

*(A) Myricetin*

|                | 500 µg/mL | 250 µg/mL | 125 µg/mL | 62.5 µg/mL | 0 µg/mL (V) | <i>S. mutans</i> |
|----------------|-----------|-----------|-----------|------------|-------------|------------------|
| Mean           | 2,908     | 4,861     | 8,489     | 8,373      | 8,710       | 8,512            |
| Std. Deviation | 0,4161    | 0,4965    | 0,09868   | 0,2486     | 0,1076      | 0,06922          |

*(B) Compound 1771*

|                | 166.7 µg/mL | 83.35 µg/mL | 41.675 µg/mL | 20.84 µg/mL | 10.42 µg/mL | 5.21 µg/mL | 2.605 µg/mL | 1.302 µg/mL | 0.651 µg/mL | 0.3255 µg/mL | 0 µg/mL (V) | <i>S. mutans</i> |
|----------------|-------------|-------------|--------------|-------------|-------------|------------|-------------|-------------|-------------|--------------|-------------|------------------|
| Mean           | 3,946       | 3,822       | 4,262        | 4,556       | 4,503       | 4,652      | 4,718       | 4,635       | 5,549       | 8,537        | 8,519       | 8,521            |
| Std. Deviation | 0,4843      | 0,5453      | 0,4776       | 0,09482     | 0,2923      | 0,05589    | 0,1475      | 0,07116     | 0,5293      | 0,2134       | 0,2937      | 0,2347           |

**Table S2. Antibiofilm Activity Using the Polystyrene Microplate Model: data shown in Figure 3 as *S. mutans* viable population—CFU/mL(log) (A) and biomass—%OD<sub>570nm</sub> (B).**

|                                                    |                | Myr 2xMIC | Myr MIC | V (Myr) | 1771 2xMIC | 1771 MIC | V (1771) | <i>S. mutans</i> |
|----------------------------------------------------|----------------|-----------|---------|---------|------------|----------|----------|------------------|
| <i>(A) S. mutans viable population—CFU/mL(log)</i> | Minimum        | 0,000     | 0,000   | 6,000   | 2,300      | 2,000    | 6,000    | 6,000            |
|                                                    | 25% Percentile | 0,000     | 0,000   | 6,435   | 2,780      | 2,480    | 6,300    | 6,300            |
|                                                    | Median         | 0,000     | 0,000   | 6,700   | 2,900      | 2,780    | 6,700    | 7,280            |
|                                                    | 75% Percentile | 1,110     | 2,225   | 6,900   | 3,133      | 3,018    | 6,850    | 7,395            |
|                                                    | Maximum        | 2,150     | 2,780   | 7,000   | 3,380      | 3,230    | 7,000    | 7,430            |
| <i>(B) Biomass—%OD<sub>570nm</sub></i>             | Minimum        | 0,06000   | 0,000   | 57,73   | 0,05000    | 0,05000  | 56,54    | 48,25            |
|                                                    | 25% Percentile | 0,3000    | 0,1350  | 71,77   | 0,1100     | 0,1750   | 71,48    | 81,32            |
|                                                    | Median         | 0,3900    | 0,3000  | 114,6   | 0,3550     | 0,4650   | 106,6    | 103,3            |
|                                                    | 75% Percentile | 0,5850    | 0,4800  | 124,1   | 0,9175     | 2,140    | 120,2    | 122,7            |
|                                                    | Maximum        | 0,8900    | 0,6000  | 136,4   | 2,360      | 5,390    | 126,9    | 145,1            |

Myr: myricetin. 1771: compound 1771. V: vehicle used for each compound. MIC: minimum inhibitory concentration.

**Table S3. pH of spent culture media from topically treated biofilms at distinct developmental phases: data shown in Figure 4.**

| Data per time point |                | Myr    | 1771   | Myr+1771 | Myr+F  | 1771+F | Myr+1771+ F | F      | V      |
|---------------------|----------------|--------|--------|----------|--------|--------|-------------|--------|--------|
| 19 h                | Mean           | 5,8042 | 5,9022 | 5,7930   | 5,6747 | 5,6827 | 5,6912      | 5,7600 | 5,7365 |
|                     | Std. Deviation | 0,1242 | 0,0674 | 0,1142   | 0,2440 | 0,1286 | 0,2162      | 0,1611 | 0,1478 |
| 27 h                | Mean           | 5,4593 | 5,4500 | 5,4947   | 5,4098 | 5,4427 | 5,1782      | 5,3920 | 5,3665 |
|                     | Std. Deviation | 0,0503 | 0,1267 | 0,0903   | 0,1106 | 0,0380 | 1,4427      | 0,1103 | 0,0975 |
| 43 h                | Mean           | 4,6765 | 4,6765 | 4,6543   | 4,7797 | 4,7007 | 4,8585      | 4,6113 | 4,3413 |
|                     | Std. Deviation | 0,0524 | 0,0205 | 0,0311   | 0,0946 | 0,0467 | 1,0285      | 0,0490 | 0,0441 |
| 51 h                | Mean           | 5,4390 | 5,4067 | 5,4208   | 5,3720 | 5,4950 | 4,8424      | 5,3973 | 5,1930 |
|                     | Std. Deviation | 0,0860 | 0,0874 | 0,0962   | 0,1596 | 0,0331 | 1,1536      | 0,0850 | 0,0396 |
| 67 h                | Mean           | 5,0578 | 4,9503 | 5,0277   | 5,1602 | 5,3238 | 5,1464      | 5,3658 | 4,4845 |
|                     | Std. Deviation | 0,1270 | 0,0362 | 0,1338   | 0,1796 | 0,0416 | 1,1749      | 0,0934 | 0,0779 |

**Table S4. *S. mutans* viable counts (A) and insoluble biomass (dry-weight) (B) of topically treated biofilms: data shown in Figure 5.**

|                                                |                | Myr    | 1771   | Myr+1771 | Myr+F  | 1771+F | Myr+1771+ F | F      | V      |
|------------------------------------------------|----------------|--------|--------|----------|--------|--------|-------------|--------|--------|
| (A) <i>S. mutans</i> viable counts—CFU/mL(log) | Mean           | 6,840  | 8,095  | 7,779    | 7,025  | 6,965  | 5,790       | 6,952  | 8,870  |
|                                                | Std. Deviation | 0,3099 | 0,2278 | 0,2146   | 0,1841 | 0,2293 | 0,2283      | 0,2832 | 0,2575 |
| (B) Insoluble biomass—mg                       | Mean           | 2,737  | 3,273  | 3,156    | 2,873  | 2,848  | 1,654       | 2,856  | 4,090  |
|                                                | Std. Deviation | 0,7325 | 0,4864 | 0,1917   | 0,4383 | 0,2401 | 0,1982      | 0,1645 | 0,3950 |

**Table S5. The extracellular matrix components in the topically treated biofilms: data shown in Figure 6.**

| Matrix component                       |                | Myr   | 1771  | Myr+1771 | Myr+F | 1771+F | Myr+1771+ F | F     | V     |
|----------------------------------------|----------------|-------|-------|----------|-------|--------|-------------|-------|-------|
| (A) Water-soluble EPS— $\mu\text{g}$   | Mean           | 77,76 | 116,7 | 83,63    | 96,82 | 65,16  | 58,37       | 118,6 | 223,5 |
|                                        | Std. Deviation | 10,23 | 38,09 | 16,93    | 12,59 | 17,65  | 24,20       | 18,66 | 35,28 |
| (B) Water-insoluble EPS— $\mu\text{g}$ | Mean           | 232,0 | 505,2 | 539,5    | 334,7 | 414,8  | 141,5       | 500,1 | 1134  |
|                                        | Std. Deviation | 59,29 | 137,1 | 113,3    | 106,4 | 38,80  | 49,39       | 43,65 | 72,73 |
| (C) eDNA—ng                            | Mean           | 187,5 | 219,1 | 174,3    | 186,7 | 181,7  | 186,6       | 211,8 | 220,4 |
|                                        | Std. Deviation | 33,80 | 31,27 | 28,63    | 18,59 | 19,42  | 31,94       | 38,27 | 58,74 |
| (D) LTA— $\mu\text{g}$                 | Mean           | 77,76 | 116,7 | 83,63    | 96,82 | 65,16  | 58,37       | 118,6 | 223,5 |
|                                        | Std. Deviation | 10,23 | 38,09 | 16,93    | 12,59 | 17,65  | 24,20       | 18,66 | 35,28 |

**Table S6. Biovolume of bacteria and EPS in topically treated biofilms: data shown in Figure 8. Biovolume is represented as biomass ( $\mu\text{m}^3/\mu\text{m}^2$ ) of bacteria (A) and EPS (B).**

|              |                | Myr   | 1771  | Myr+1771 | Myr+F | 1771+F | Myr+1771+ F | F     | V     |
|--------------|----------------|-------|-------|----------|-------|--------|-------------|-------|-------|
| Bacteria (A) | Mean           | 33,01 | 29,23 | 26,50    | 23,38 | 26,31  | 17,33       | 32,67 | 48,72 |
|              | Std. Deviation | 12,99 | 14,26 | 7,544    | 13,25 | 8,009  | 5,874       | 10,73 | 26,04 |
| EPS (B)      | Mean           | 27,64 | 25,62 | 23,05    | 19,28 | 22,45  | 17,93       | 28,60 | 36,75 |
|              | Std. Deviation | 6,661 | 8,974 | 6,323    | 8,328 | 5,747  | 3,839       | 4,609 | 17,22 |

**Table S7. Data used to construct the profile of the distribution of bacteria and EPS in each of the topically treated biofilms. The data shown are the mean (and error) percentage coverage per area from the interface substratum/biofilm (hydroxyapatite disc— 0  $\mu\text{m}$ ) to the top (outer layer) of each biofilm at 67 h: data shown in Figure 9.**

| Treatment | Myr      |      |      |     | 1771     |     |      |     | Myr+1771 |     |      |      | Myr+F    |     |      |     | 1771+F   |     |      |     | Myr+1771+F |     |      |     | F        |     |      |     | V        |     |      |     |
|-----------|----------|------|------|-----|----------|-----|------|-----|----------|-----|------|------|----------|-----|------|-----|----------|-----|------|-----|------------|-----|------|-----|----------|-----|------|-----|----------|-----|------|-----|
|           | Bacteria |      | EPS  |     | Bacteria |     | EPS  |     | Bacteria |     | EPS  |      | Bacteria |     | EPS  |     | Bacteria |     | EPS  |     | Bacteria   |     | EPS  |     | Bacteria |     | EPS  |     | Bacteria |     | EPS  |     |
|           | Mean     | SEM  | Mean | SEM | Mean     | SEM | Mean | SEM | Mean     | SEM | Mean | SEM  | Mean     | SEM | Mean | SEM | Mean     | SEM | Mean | SEM | Mean       | SEM | Mean | SEM | Mean     | SEM | Mean | SEM | Mean     | SEM |      |     |
| 0         | 45,0     | 10,6 | 62,4 | 9,6 | 51,1     | 5,8 | 77,9 | 2,9 | 47,1     | 7,8 | 55,1 | 10,4 | 51,1     | 6,1 | 69,7 | 4,3 | 52,6     | 3,3 | 62,3 | 3,6 | 59,7       | 3,6 | 89,3 | 2,3 | 64,4     | 5,0 | 81,4 | 3,7 | 58,6     | 3,9 | 64,6 | 8,7 |
| 1         | 39,5     | 6,0  | 63,8 | 9,3 | 51,5     | 5,9 | 77,9 | 3,3 | 50,1     | 8,3 | 58,7 | 10,8 | 50,5     | 6,3 | 68,9 | 5,1 | 56,3     | 3,2 | 64,2 | 4,1 | 59,8       | 3,8 | 89,0 | 2,4 | 64,8     | 5,0 | 81,6 | 3,9 | 59,8     | 4,0 | 65,8 | 8,7 |
| 2         | 39,2     | 4,7  | 59,2 | 6,9 | 51,9     | 6,0 | 77,5 | 3,5 | 51,4     | 8,5 | 60,2 | 10,8 | 49,9     | 6,5 | 67,2 | 5,5 | 56,6     | 3,0 | 63,4 | 4,4 | 59,5       | 4,2 | 87,6 | 2,9 | 66,4     | 4,8 | 82,1 | 4,1 | 60,4     | 4,2 | 66,6 | 8,7 |
| 3         | 40,1     | 4,7  | 59,4 | 6,9 | 51,2     | 6,3 | 75,3 | 4,7 | 52,1     | 8,4 | 59,9 | 10,8 | 49,2     | 6,5 | 64,7 | 5,6 | 58,5     | 3,1 | 63,3 | 4,6 | 58,9       | 4,5 | 85,4 | 3,2 | 66,1     | 4,9 | 82,1 | 3,8 | 61,7     | 4,3 | 66,9 | 8,9 |
| 4         | 38,8     | 5,7  | 60,1 | 7,1 | 51,1     | 6,3 | 74,4 | 4,8 | 52,5     | 8,4 | 58,7 | 10,6 | 48,3     | 6,8 | 61,6 | 6,5 | 58,3     | 3,1 | 61,9 | 4,8 | 58,4       | 4,6 | 84,5 | 3,4 | 66,5     | 4,9 | 82,2 | 3,7 | 61,3     | 4,2 | 67,7 | 8,7 |
| 5         | 41,3     | 5,1  | 59,5 | 7,2 | 49,9     | 6,4 | 71,2 | 5,5 | 52,5     | 8,3 | 57,6 | 10,5 | 47,1     | 6,7 | 57,9 | 6,3 | 58,2     | 3,0 | 60,6 | 5,1 | 56,9       | 5,0 | 80,4 | 4,2 | 65,7     | 5,1 | 81,2 | 4,3 | 61,7     | 4,4 | 67,8 | 8,6 |
| 6         | 39,0     | 6,1  | 58,3 | 7,0 | 49,3     | 6,4 | 69,3 | 5,9 | 52,2     | 8,1 | 55,0 | 10,0 | 46,1     | 6,9 | 54,6 | 7,0 | 57,8     | 2,9 | 58,6 | 4,7 | 56,0       | 5,2 | 78,5 | 4,3 | 64,7     | 5,2 | 79,1 | 4,6 | 62,3     | 4,1 | 67,6 | 8,5 |
| 7         | 41,8     | 5,5  | 58,2 | 7,1 | 47,7     | 6,6 | 65,9 | 5,5 | 51,5     | 8,0 | 52,2 | 9,6  | 45,0     | 7,0 | 51,8 | 7,6 | 56,7     | 3,2 | 56,8 | 5,4 | 54,7       | 5,5 | 75,5 | 5,1 | 64,5     | 5,5 | 79,1 | 4,1 | 61,9     | 4,4 | 68,0 | 8,3 |
| 8         | 38,7     | 6,6  | 56,9 | 7,0 | 47,0     | 6,6 | 62,3 | 5,9 | 51,1     | 7,6 | 50,1 | 9,1  | 44,0     | 7,2 | 47,4 | 7,3 | 55,6     | 3,0 | 54,1 | 4,7 | 52,2       | 5,7 | 70,9 | 5,5 | 61,4     | 5,7 | 75,7 | 4,8 | 62,0     | 4,0 | 67,7 | 7,9 |
| 9         | 42,1     | 5,8  | 54,9 | 6,6 | 46,0     | 6,6 | 59,4 | 5,4 | 49,8     | 7,3 | 46,2 | 8,5  | 42,7     | 7,3 | 44,4 | 7,7 | 54,3     | 3,2 | 52,0 | 5,0 | 51,6       | 5,8 | 69,2 | 5,6 | 62,6     | 5,9 | 76,0 | 4,7 | 61,7     | 4,5 | 66,9 | 7,8 |
| 10        | 38,8     | 6,9  | 54,1 | 6,6 | 44,5     | 6,8 | 54,4 | 5,1 | 49,2     | 7,2 | 44,7 | 8,3  | 41,3     | 7,3 | 33,6 | 9,3 | 53,2     | 3,4 | 50,2 | 5,0 | 49,1       | 6,3 | 62,4 | 6,0 | 60,8     | 6,2 | 73,2 | 4,9 | 61,8     | 4,0 | 66,6 | 7,4 |
| 11        | 42,4     | 5,9  | 51,4 | 6,1 | 43,6     | 6,9 | 51,6 | 4,8 | 47,9     | 6,7 | 41,1 | 7,3  | 40,5     | 7,3 | 29,9 | 9,7 | 51,4     | 3,4 | 47,1 | 4,7 | 47,8       | 6,4 | 59,8 | 6,3 | 60,0     | 6,4 | 69,5 | 5,7 | 60,8     | 4,5 | 65,9 | 7,2 |
| 12        | 38,1     | 7,2  | 50,6 | 5,9 | 42,0     | 6,8 | 47,1 | 4,2 | 46,4     | 6,6 | 38,7 | 7,0  | 38,2     | 6,9 | 27,2 | 8,6 | 50,2     | 3,9 | 45,9 | 5,1 | 45,9       | 6,6 | 56,6 | 6,9 | 56,6     | 6,2 | 66,7 | 5,8 | 61,5     | 4,0 | 65,7 | 6,9 |
| 13        | 42,1     | 6,3  | 49,4 | 5,8 | 41,4     | 6,8 | 43,5 | 3,9 | 45,6     | 6,2 | 36,6 | 6,4  | 37,0     | 7,1 | 26,2 | 8,5 | 48,3     | 4,1 | 43,0 | 5,0 | 43,4       | 6,8 | 50,9 | 6,9 | 54,6     | 6,2 | 66,0 | 6,1 | 59,9     | 4,5 | 64,3 | 6,5 |
| 14        | 39,3     | 7,0  | 46,8 | 5,4 | 40,4     | 6,8 | 39,9 | 2,7 | 43,6     | 5,9 | 33,4 | 5,6  | 36,3     | 7,1 | 24,0 | 7,3 | 46,9     | 4,3 | 41,5 | 5,2 | 42,6       | 6,8 | 48,4 | 6,6 | 56,7     | 6,8 | 64,8 | 6,3 | 59,8     | 4,8 | 63,5 | 7,0 |
| 15        | 37,9     | 7,5  | 46,5 | 5,3 | 39,1     | 7,0 | 36,3 | 2,6 | 42,9     | 5,9 | 32,4 | 5,4  | 34,5     | 7,0 | 22,5 | 6,9 | 45,8     | 4,6 | 40,1 | 5,3 | 39,5       | 6,9 | 43,1 | 6,8 | 55,3     | 6,9 | 61,4 | 6,3 | 60,3     | 4,3 | 63,1 | 6,1 |
| 16        | 37,3     | 7,7  | 44,1 | 5,0 | 37,9     | 7,0 | 33,5 | 1,9 | 41,2     | 5,4 | 29,7 | 4,7  | 32,5     | 6,5 | 21,6 | 6,4 | 43,9     | 4,8 | 38,1 | 5,4 | 38,2       | 6,9 | 39,9 | 6,4 | 51,3     | 6,3 | 59,7 | 6,6 | 60,1     | 4,4 | 62,6 | 6,0 |
| 17        | 38,9     | 7,4  | 43,1 | 4,9 | 36,7     | 7,1 | 30,6 | 1,4 | 39,9     | 5,3 | 28,4 | 4,5  | 31,4     | 6,4 | 26,6 | 6,9 | 43,1     | 5,0 | 37,3 | 5,6 | 36,8       | 7,0 | 36,6 | 6,1 | 53,7     | 7,0 | 57,7 | 6,4 | 58,7     | 5,2 | 62,2 | 5,8 |
| 18        | 37,2     | 7,9  | 41,6 | 5,1 | 35,3     | 7,1 | 28,4 | 1,8 | 38,9     | 5,1 | 27,2 | 4,5  | 29,9     | 6,0 | 20,8 | 4,8 | 41,4     | 5,3 | 35,6 | 5,7 | 34,1       | 6,8 | 32,4 | 5,8 | 52,3     | 7,0 | 55,4 | 6,6 | 59,2     | 4,7 | 59,9 | 6,4 |
| 19        | 38,1     | 7,5  | 39,9 | 4,8 | 34,5     | 7,1 | 26,3 | 1,3 | 37,1     | 4,8 | 25,5 | 4,4  | 28,0     | 5,4 | 17,0 | 4,4 | 40,4     | 5,4 | 34,8 | 5,8 | 33,4       | 6,8 | 30,5 | 5,2 | 51,8     | 7,0 | 54,4 | 6,6 | 58,1     | 5,5 | 61,1 | 5,8 |

|    |      |     |      |     |      |     |      |     |      |     |      |     |      |     |      |     |      |     |      |     |      |     |      |     |      |     |      |     |      |      |      |      |
|----|------|-----|------|-----|------|-----|------|-----|------|-----|------|-----|------|-----|------|-----|------|-----|------|-----|------|-----|------|-----|------|-----|------|-----|------|------|------|------|
| 20 | 38,0 | 7,7 | 39,2 | 5,0 | 33,2 | 7,3 | 24,4 | 1,9 | 36,6 | 4,8 | 25,1 | 4,5 | 26,8 | 4,9 | 16,5 | 4,0 | 39,5 | 5,5 | 33,9 | 5,9 | 31,0 | 6,6 | 27,1 | 4,9 | 50,3 | 6,9 | 51,9 | 6,4 | 57,4 | 5,7  | 60,1 | 5,8  |
| 21 | 36,8 | 8,0 | 37,6 | 5,1 | 31,9 | 7,1 | 22,9 | 2,1 | 35,0 | 4,6 | 23,9 | 4,8 | 25,1 | 4,5 | 16,2 | 3,6 | 38,2 | 5,5 | 32,7 | 5,9 | 29,5 | 6,4 | 25,1 | 4,6 | 49,5 | 6,9 | 50,7 | 6,5 | 58,6 | 5,2  | 59,7 | 5,8  |
| 22 | 36,7 | 8,0 | 37,2 | 5,0 | 31,1 | 7,3 | 21,6 | 2,3 | 34,0 | 4,6 | 23,6 | 5,2 | 24,0 | 3,8 | 21,1 | 5,5 | 37,5 | 5,6 | 32,1 | 5,9 | 28,0 | 6,1 | 23,0 | 4,2 | 48,6 | 6,7 | 49,2 | 6,3 | 58,4 | 5,4  | 57,9 | 6,6  |
| 23 | 37,4 | 7,9 | 36,6 | 5,2 | 30,1 | 7,5 | 20,5 | 2,6 | 33,4 | 4,9 | 22,7 | 4,9 | 22,9 | 3,6 | 16,2 | 2,7 | 36,4 | 5,6 | 30,9 | 5,9 | 26,0 | 5,8 | 20,6 | 3,7 | 47,4 | 6,7 | 47,5 | 6,4 | 56,4 | 6,2  | 58,4 | 6,1  |
| 24 | 36,1 | 8,2 | 35,3 | 5,3 | 28,9 | 7,0 | 19,5 | 2,7 | 32,1 | 4,9 | 22,3 | 5,4 | 21,6 | 2,9 | 14,1 | 2,6 | 35,6 | 5,6 | 30,2 | 5,9 | 25,0 | 5,5 | 19,4 | 3,4 | 46,7 | 6,6 | 46,5 | 6,2 | 56,3 | 6,5  | 58,4 | 6,2  |
| 25 | 36,5 | 8,2 | 34,8 | 5,6 | 28,1 | 7,0 | 18,7 | 2,8 | 31,7 | 5,1 | 22,2 | 5,6 | 20,7 | 2,7 | 13,3 | 2,7 | 34,8 | 5,5 | 29,4 | 5,8 | 23,2 | 5,2 | 17,5 | 3,0 | 45,3 | 6,5 | 44,6 | 6,1 | 57,4 | 6,0  | 57,5 | 6,4  |
| 26 | 36,2 | 8,2 | 33,9 | 5,7 | 27,1 | 6,8 | 18,0 | 2,9 | 30,6 | 5,3 | 22,0 | 5,9 | 19,7 | 2,5 | 14,0 | 2,2 | 33,7 | 5,4 | 28,3 | 5,7 | 22,0 | 4,9 | 16,4 | 2,9 | 44,5 | 6,5 | 43,5 | 6,1 | 57,1 | 6,3  | 57,1 | 6,6  |
| 27 | 36,1 | 8,3 | 33,2 | 5,9 | 26,2 | 6,4 | 17,4 | 3,0 | 30,1 | 5,4 | 21,6 | 5,9 | 18,9 | 2,1 | 12,5 | 2,5 | 33,0 | 5,4 | 27,7 | 5,6 | 20,8 | 4,6 | 15,2 | 2,6 | 43,5 | 6,2 | 42,1 | 5,9 | 55,5 | 7,0  | 55,2 | 7,3  |
| 28 | 36,0 | 8,3 | 32,8 | 6,0 | 25,5 | 6,5 | 16,8 | 2,9 | 29,6 | 5,6 | 21,6 | 6,1 | 18,1 | 2,2 | 13,6 | 2,0 | 31,8 | 5,3 | 26,6 | 5,5 | 19,3 | 4,3 | 13,9 | 2,4 | 42,3 | 6,3 | 40,6 | 5,9 | 54,9 | 7,2  | 56,0 | 6,9  |
| 29 | 35,7 | 8,3 | 32,1 | 6,1 | 24,4 | 5,9 | 16,3 | 3,0 | 28,6 | 5,8 | 22,5 | 6,3 | 17,3 | 2,0 | 12,0 | 2,4 | 31,0 | 5,2 | 25,9 | 5,4 | 18,5 | 4,0 | 13,2 | 2,2 | 41,5 | 6,0 | 39,7 | 5,7 | 54,7 | 7,5  | 54,0 | 7,8  |
| 30 | 35,7 | 8,4 | 31,9 | 6,2 | 23,8 | 5,8 | 15,8 | 2,9 | 28,4 | 5,9 | 22,4 | 6,3 | 16,8 | 2,0 | 13,1 | 1,9 | 30,1 | 5,0 | 25,1 | 5,2 | 17,2 | 3,7 | 12,1 | 2,0 | 40,2 | 5,9 | 37,9 | 5,6 | 56,1 | 7,0  | 55,2 | 7,4  |
| 31 | 35,3 | 8,4 | 31,1 | 6,3 | 23,0 | 5,6 | 15,4 | 2,8 | 27,5 | 6,0 | 22,5 | 6,4 | 16,2 | 2,1 | 12,5 | 2,1 | 29,0 | 4,9 | 24,1 | 5,1 | 16,5 | 3,5 | 11,5 | 1,9 | 39,3 | 5,9 | 37,2 | 5,7 | 54,0 | 7,8  | 54,7 | 7,6  |
| 32 | 35,2 | 8,4 | 30,9 | 6,3 | 22,2 | 5,3 | 15,0 | 2,8 | 27,0 | 6,1 | 22,1 | 6,5 | 15,7 | 2,0 | 11,3 | 2,4 | 28,3 | 4,8 | 23,5 | 4,9 | 15,6 | 3,3 | 10,8 | 1,9 | 38,1 | 5,6 | 36,0 | 5,5 | 53,6 | 8,1  | 54,3 | 7,7  |
| 33 | 35,0 | 8,5 | 30,6 | 6,4 | 21,7 | 5,3 | 14,5 | 2,7 | 26,6 | 6,2 | 22,0 | 6,5 | 15,2 | 2,1 | 11,8 | 2,2 | 27,1 | 4,6 | 22,4 | 4,7 | 14,6 | 3,0 | 10,0 | 1,7 | 37,0 | 5,6 | 34,4 | 5,3 | 55,1 | 7,6  | 53,5 | 8,0  |
| 34 | 34,7 | 8,5 | 30,1 | 6,4 | 20,8 | 4,8 | 14,1 | 2,6 | 25,9 | 6,2 | 21,7 | 6,6 | 14,8 | 2,1 | 12,6 | 1,7 | 26,3 | 4,5 | 21,7 | 4,5 | 14,0 | 2,9 | 9,6  | 1,7 | 36,1 | 5,3 | 33,8 | 5,3 | 54,9 | 7,8  | 53,3 | 8,2  |
| 35 | 34,6 | 8,5 | 29,9 | 6,5 | 20,2 | 4,7 | 13,6 | 2,5 | 25,5 | 6,2 | 21,5 | 6,5 | 14,5 | 2,1 | 17,2 | 5,7 | 25,4 | 4,2 | 20,9 | 4,2 | 13,1 | 2,7 | 9,0  | 1,6 | 34,7 | 5,2 | 31,9 | 5,0 | 52,5 | 8,6  | 52,5 | 8,4  |
| 36 | 34,1 | 8,6 | 29,3 | 6,5 | 19,5 | 4,5 | 13,2 | 2,4 | 24,8 | 6,3 | 21,1 | 6,5 | 14,2 | 2,1 | 12,8 | 1,6 | 24,4 | 4,1 | 20,0 | 4,1 | 12,5 | 2,6 | 8,5  | 1,6 | 33,8 | 5,1 | 31,2 | 5,0 | 52,0 | 8,8  | 52,0 | 8,6  |
| 37 | 34,0 | 8,6 | 29,0 | 6,5 | 18,9 | 4,3 | 12,8 | 2,3 | 24,4 | 6,3 | 21,1 | 6,5 | 13,8 | 2,1 | 11,9 | 2,0 | 23,7 | 3,9 | 19,4 | 3,8 | 11,9 | 2,4 | 8,1  | 1,6 | 32,6 | 4,9 | 30,0 | 4,9 | 53,8 | 8,4  | 51,5 | 8,8  |
| 38 | 33,6 | 8,6 | 28,6 | 6,5 | 18,3 | 4,2 | 12,3 | 2,1 | 23,8 | 6,2 | 20,7 | 6,4 | 13,6 | 2,1 | 15,4 | 4,6 | 22,5 | 3,7 | 18,5 | 3,5 | 11,2 | 2,3 | 7,6  | 1,5 | 31,5 | 4,9 | 28,6 | 4,7 | 53,1 | 8,6  | 50,6 | 9,1  |
| 39 | 33,3 | 8,6 | 28,0 | 6,5 | 17,6 | 3,8 | 12,0 | 2,0 | 23,2 | 6,2 | 20,3 | 6,4 | 13,3 | 2,1 | 10,9 | 2,0 | 21,8 | 3,6 | 17,8 | 3,4 | 10,8 | 2,2 | 7,3  | 1,5 | 30,9 | 4,9 | 28,1 | 4,7 | 51,1 | 9,2  | 50,3 | 9,2  |
| 40 | 33,1 | 8,6 | 27,7 | 6,5 | 17,1 | 3,7 | 11,5 | 1,8 | 22,9 | 6,1 | 20,0 | 6,3 | 13,1 | 2,1 | 10,4 | 2,0 | 21,0 | 3,2 | 17,1 | 3,1 | 10,1 | 2,1 | 6,9  | 1,5 | 29,2 | 4,7 | 26,2 | 4,4 | 52,3 | 9,0  | 49,4 | 9,4  |
| 41 | 32,6 | 8,6 | 27,0 | 6,5 | 16,5 | 3,6 | 11,1 | 1,7 | 22,2 | 6,0 | 19,7 | 6,2 | 12,9 | 2,1 | 12,0 | 1,7 | 20,0 | 3,1 | 16,2 | 3,0 | 9,7  | 2,0 | 6,6  | 1,4 | 28,5 | 4,7 | 25,5 | 4,4 | 50,0 | 9,6  | 48,7 | 9,6  |
| 42 | 32,4 | 8,6 | 26,7 | 6,4 | 16,0 | 3,4 | 10,8 | 1,7 | 21,8 | 6,0 | 19,4 | 6,2 | 12,6 | 2,1 | 14,4 | 4,4 | 19,3 | 2,9 | 15,7 | 2,8 | 9,3  | 1,9 | 6,3  | 1,4 | 27,3 | 4,5 | 24,4 | 4,3 | 51,5 | 9,2  | 48,2 | 9,7  |
| 43 | 32,0 | 8,6 | 26,1 | 6,4 | 15,5 | 3,3 | 10,3 | 1,5 | 21,1 | 5,7 | 18,8 | 5,9 | 12,5 | 2,2 | 11,9 | 1,9 | 18,4 | 2,7 | 14,9 | 2,5 | 8,7  | 1,9 | 5,9  | 1,4 | 25,9 | 4,3 | 23,0 | 4,1 | 48,9 | 10,0 | 47,3 | 10,0 |
| 44 | 31,6 | 8,6 | 25,6 | 6,4 | 14,9 | 3,1 | 10,0 | 1,4 | 20,5 | 5,7 | 18,4 | 5,9 | 12,1 | 2,1 | 11,5 | 2,3 | 17,7 | 2,6 | 14,3 | 2,5 | 8,4  | 1,8 | 5,8  | 1,4 | 25,4 | 4,3 | 22,5 | 4,0 | 50,6 | 9,5  | 46,9 | 10,0 |
| 45 | 31,3 | 8,6 | 25,1 | 6,3 | 14,4 | 3,0 | 9,5  | 1,3 | 20,2 | 5,5 | 18,0 | 5,7 | 12,0 | 2,2 | 9,0  | 2,0 | 16,9 | 2,3 | 13,7 | 2,1 | 7,9  | 1,7 | 5,4  | 1,4 | 23,6 | 4,0 | 20,8 | 3,7 | 49,9 | 9,8  | 46,0 | 10,3 |

|    |      |     |      |     |      |     |     |     |      |     |      |     |      |     |      |     |      |     |      |     |     |     |     |     |      |     |      |     |      |      |      |      |
|----|------|-----|------|-----|------|-----|-----|-----|------|-----|------|-----|------|-----|------|-----|------|-----|------|-----|-----|-----|-----|-----|------|-----|------|-----|------|------|------|------|
| 46 | 30,7 | 8,6 | 24,4 | 6,3 | 13,9 | 2,9 | 9,2 | 1,2 | 19,5 | 5,3 | 17,4 | 5,5 | 11,7 | 2,2 | 13,8 | 3,7 | 16,0 | 2,3 | 13,0 | 2,1 | 7,6 | 1,7 | 5,2 | 1,3 | 22,9 | 3,9 | 20,2 | 3,7 | 49,2 | 9,9  | 45,2 | 10,4 |
| 47 | 30,5 | 8,5 | 24,0 | 6,1 | 13,4 | 2,8 | 8,9 | 1,2 | 19,0 | 5,3 | 17,1 | 5,5 | 11,5 | 2,2 | 11,6 | 2,3 | 15,4 | 2,1 | 12,5 | 2,0 | 7,3 | 1,6 | 5,0 | 1,3 | 21,8 | 3,8 | 19,1 | 3,5 | 48,7 | 10,1 | 44,7 | 10,5 |
| 48 | 30,0 | 8,5 | 23,4 | 6,1 | 12,8 | 2,7 | 8,4 | 1,0 | 18,4 | 4,9 | 16,4 | 5,1 | 11,3 | 2,2 | 12,1 | 3,1 | 14,5 | 1,9 | 11,8 | 1,8 | 6,9 | 1,6 | 4,7 | 1,3 | 20,5 | 3,6 | 17,9 | 3,3 | 47,9 | 10,3 | 43,7 | 10,6 |
| 49 | 29,5 | 8,5 | 22,8 | 6,0 | 12,4 | 2,6 | 8,1 | 1,1 | 17,7 | 4,8 | 15,9 | 5,1 | 11,0 | 2,2 | 12,0 | 3,2 | 13,9 | 1,9 | 11,3 | 1,9 | 6,6 | 1,5 | 4,6 | 1,3 | 20,0 | 3,5 | 17,4 | 3,2 | 47,4 | 10,4 | 43,3 | 10,6 |
| 50 | 29,1 | 8,3 | 22,2 | 5,8 | 11,9 | 2,5 | 7,7 | 1,1 | 17,3 | 4,6 | 15,5 | 4,9 | 10,8 | 2,3 | 8,5  | 1,8 | 13,2 | 1,6 | 10,7 | 1,6 | 6,3 | 1,5 | 4,4 | 1,2 | 18,4 | 3,2 | 15,9 | 2,9 | 46,7 | 10,6 | 42,5 | 10,8 |
| 51 | 28,6 | 8,4 | 21,5 | 5,8 | 11,4 | 2,5 | 7,5 | 1,1 | 16,6 | 4,4 | 14,7 | 4,6 | 10,6 | 2,3 | 8,7  | 1,8 | 12,5 | 1,7 | 10,2 | 1,7 | 6,0 | 1,4 | 4,2 | 1,2 | 17,8 | 3,1 | 15,3 | 2,9 | 46,0 | 10,7 | 41,6 | 10,8 |
| 52 | 28,2 | 8,3 | 21,1 | 5,6 | 11,0 | 2,4 | 7,2 | 1,1 | 16,2 | 4,3 | 14,4 | 4,6 | 10,4 | 2,3 | 8,5  | 1,9 | 11,9 | 1,5 | 9,7  | 1,6 | 5,8 | 1,4 | 4,1 | 1,2 | 16,8 | 2,9 | 14,4 | 2,7 | 45,4 | 10,8 | 40,0 | 11,1 |
| 53 | 27,6 | 8,2 | 20,4 | 5,5 | 10,6 | 2,4 | 6,9 | 1,2 | 15,4 | 3,9 | 13,6 | 4,2 | 10,2 | 2,4 | 8,3  | 1,9 | 11,2 | 1,4 | 9,1  | 1,5 | 5,4 | 1,3 | 3,9 | 1,2 | 15,6 | 2,7 | 13,3 | 2,5 | 44,6 | 11,0 | 40,1 | 11,0 |
| 54 | 27,1 | 8,2 | 19,8 | 5,4 | 10,2 | 2,4 | 6,6 | 1,3 | 14,8 | 3,8 | 13,1 | 4,2 | 9,9  | 2,4 | 8,1  | 1,9 | 10,7 | 1,5 | 8,6  | 1,6 | 5,3 | 1,3 | 3,8 | 1,2 | 15,2 | 2,7 | 12,9 | 2,5 | 44,1 | 11,0 | 39,7 | 11,0 |
| 55 | 26,6 | 8,0 | 19,2 | 5,2 | 9,8  | 2,4 | 6,4 | 1,3 | 14,3 | 3,6 | 12,7 | 4,0 | 9,7  | 2,3 | 7,9  | 1,9 | 10,1 | 1,3 | 8,0  | 1,4 | 5,6 | 1,3 | 4,2 | 1,2 | 13,8 | 2,4 | 11,6 | 2,2 | 43,5 | 11,2 | 39,1 | 11,1 |
| 56 | 26,0 | 8,0 | 18,4 | 5,1 | 9,5  | 2,4 | 6,2 | 1,4 | 13,6 | 3,3 | 11,9 | 3,8 | 9,5  | 2,3 | 7,7  | 1,9 | 9,5  | 1,4 | 7,6  | 1,5 | 5,4 | 1,3 | 4,1 | 1,1 | 13,3 | 2,3 | 11,1 | 2,1 | 42,7 | 11,2 | 37,4 | 11,2 |
| 57 | 25,6 | 7,8 | 18,0 | 4,9 | 9,2  | 2,4 | 6,0 | 1,5 | 13,1 | 3,2 | 11,6 | 3,8 | 9,1  | 2,3 | 7,5  | 1,9 | 9,0  | 1,3 | 7,1  | 1,4 | 5,2 | 1,2 | 3,9 | 1,1 | 12,5 | 2,2 | 10,3 | 2,0 | 42,2 | 11,3 | 36,3 | 11,2 |
| 58 | 24,9 | 7,7 | 17,0 | 4,7 | 8,9  | 2,4 | 5,7 | 1,5 | 12,4 | 2,8 | 10,9 | 3,5 | 9,0  | 2,3 | 7,4  | 1,9 | 8,4  | 1,3 | 6,6  | 1,4 | 5,8 | 1,0 | 4,4 | 1,0 | 11,6 | 2,1 | 9,5  | 1,9 | 41,5 | 11,4 | 36,9 | 11,2 |
| 59 | 24,3 | 7,6 | 16,9 | 4,8 | 8,5  | 2,4 | 5,6 | 1,6 | 11,9 | 2,7 | 10,4 | 3,5 | 8,7  | 2,3 | 7,2  | 2,0 | 8,5  | 1,5 | 7,0  | 1,4 | 5,6 | 1,0 | 4,3 | 1,1 | 11,2 | 2,1 | 9,1  | 1,8 | 40,9 | 11,4 | 35,8 | 11,1 |
| 60 | 23,8 | 7,4 | 16,1 | 4,4 | 8,2  | 2,4 | 5,3 | 1,6 | 11,5 | 2,6 | 9,8  | 3,2 | 8,5  | 2,2 | 7,0  | 1,9 | 7,9  | 1,4 | 6,5  | 1,3 | 5,4 | 0,9 | 4,1 | 1,0 | 10,3 | 2,0 | 8,2  | 1,7 | 40,4 | 11,5 | 35,2 | 11,2 |
| 61 | 23,1 | 7,4 | 15,4 | 4,4 | 8,0  | 2,4 | 5,2 | 1,7 | 10,9 | 2,4 | 9,6  | 3,3 | 8,3  | 2,2 | 6,8  | 1,9 | 7,6  | 1,5 | 6,2  | 1,4 | 5,2 | 0,9 | 4,0 | 1,0 | 8,9  | 2,0 | 6,8  | 1,7 | 39,6 | 11,4 | 33,9 | 11,1 |
| 62 | 22,7 | 7,2 | 14,9 | 4,2 | 8,7  | 2,7 | 5,9 | 1,8 | 10,4 | 2,3 | 9,1  | 3,2 | 8,0  | 2,1 | 6,5  | 1,8 | 7,2  | 1,5 | 5,9  | 1,3 | 5,0 | 0,9 | 3,8 | 1,0 | 9,3  | 2,2 | 7,3  | 1,6 | 39,1 | 11,5 | 33,6 | 11,1 |
| 63 | 22,0 | 7,0 | 14,3 | 4,1 | 9,6  | 3,2 | 6,9 | 1,9 | 9,9  | 2,1 | 8,5  | 3,0 | 7,8  | 2,1 | 6,2  | 1,8 | 6,7  | 1,5 | 5,5  | 1,4 | 5,0 | 1,1 | 4,1 | 1,0 | 8,5  | 2,1 | 6,6  | 1,5 | 43,4 | 12,5 | 39,1 | 11,7 |
| 64 | 21,5 | 7,0 | 13,7 | 4,0 | 9,5  | 3,1 | 6,8 | 1,9 | 9,4  | 2,1 | 8,1  | 2,9 | 7,6  | 2,1 | 6,0  | 1,7 | 6,5  | 1,5 | 5,3  | 1,4 | 4,9 | 1,1 | 4,1 | 1,0 | 8,2  | 2,0 | 6,3  | 1,4 | 42,7 | 12,4 | 37,1 | 11,7 |
| 65 | 20,7 | 6,7 | 13,1 | 3,7 | 9,3  | 3,2 | 6,7 | 2,0 | 9,0  | 2,0 | 7,8  | 2,9 | 7,3  | 2,0 | 5,6  | 1,6 | 6,1  | 1,6 | 4,9  | 1,4 | 4,7 | 1,0 | 3,9 | 1,0 | 7,5  | 1,8 | 5,6  | 1,3 | 42,5 | 12,4 | 36,6 | 11,8 |
| 66 | 20,0 | 6,6 | 12,4 | 3,7 | 9,2  | 3,1 | 6,6 | 2,0 | 8,6  | 1,9 | 7,3  | 2,8 | 7,1  | 2,0 | 5,5  | 1,6 | 6,9  | 1,5 | 5,7  | 1,3 | 4,5 | 1,0 | 3,7 | 1,0 | 7,0  | 1,7 | 5,2  | 1,2 | 41,8 | 12,4 | 36,4 | 11,6 |
| 67 | 19,6 | 6,4 | 10,6 | 3,2 | 9,0  | 3,1 | 6,5 | 2,1 | 8,2  | 1,9 | 7,0  | 2,8 | 6,7  | 1,9 | 5,1  | 1,5 | 6,6  | 1,6 | 5,4  | 1,3 | 5,4 | 0,6 | 4,4 | 0,6 | 8,3  | 0,3 | 6,0  | 0,6 | 42,0 | 12,3 | 34,7 | 11,7 |
| 68 | 19,1 | 6,3 | 11,1 | 3,2 | 8,8  | 3,1 | 6,5 | 2,1 | 7,8  | 1,8 | 6,6  | 2,7 | 6,5  | 1,9 | 4,9  | 1,5 | 6,3  | 1,7 | 5,0  | 1,4 | 5,1 | 0,6 | 4,1 | 0,6 | 7,5  | 0,3 | 5,3  | 0,6 | 41,7 | 15,2 | 37,4 | 13,9 |
| 69 | 18,6 | 6,2 | 11,2 | 3,4 | 8,7  | 3,0 | 6,4 | 2,1 | 7,4  | 1,8 | 6,3  | 2,6 | 6,2  | 1,8 | 4,6  | 1,5 | 6,1  | 1,7 | 4,9  | 1,4 | 5,0 | 0,7 | 4,1 | 0,6 | 7,3  | 0,3 | 5,1  | 0,6 | 40,8 | 15,0 | 36,3 | 13,6 |
| 70 | 17,9 | 6,0 | 10,7 | 3,2 | 8,5  | 3,0 | 6,3 | 2,1 | 6,4  | 1,9 | 6,0  | 2,6 | 5,9  | 1,7 | 4,3  | 1,4 | 5,7  | 1,9 | 4,5  | 1,5 | 4,7 | 0,6 | 3,8 | 0,6 | 6,6  | 0,2 | 4,5  | 0,4 | 40,4 | 15,1 | 35,7 | 13,7 |
| 71 | 17,2 | 5,8 | 9,1  | 2,8 | 8,4  | 3,0 | 6,2 | 2,1 | 6,9  | 1,8 | 5,6  | 2,5 | 5,8  | 1,8 | 4,1  | 1,4 | 5,5  | 1,9 | 4,3  | 1,6 | 4,5 | 0,7 | 3,6 | 0,7 | 6,2  | 0,2 | 4,2  | 0,6 | 39,4 | 15,0 | 35,0 | 13,5 |

|    |      |     |     |     |     |     |     |     |     |     |     |     |     |     |     |     |     |     |     |     |     |     |     |     |     |     |     |     |      |      |      |      |
|----|------|-----|-----|-----|-----|-----|-----|-----|-----|-----|-----|-----|-----|-----|-----|-----|-----|-----|-----|-----|-----|-----|-----|-----|-----|-----|-----|-----|------|------|------|------|
| 72 | 16,8 | 5,6 | 9,3 | 2,7 | 8,3 | 3,0 | 6,0 | 2,0 | 5,9 | 1,9 | 5,4 | 2,5 | 5,4 | 1,7 | 3,8 | 1,2 | 5,2 | 2,0 | 4,0 | 1,6 | 4,4 | 0,7 | 3,4 | 0,7 | 5,9 | 0,1 | 3,9 | 0,5 | 38,8 | 14,9 | 33,5 | 13,5 |
| 73 | 16,2 | 5,5 | 9,6 | 3,0 | 8,2 | 3,0 | 5,8 | 2,0 | 6,0 | 1,9 | 5,1 | 2,4 | 5,8 | 1,9 | 4,2 | 1,4 | 4,9 | 2,0 | 3,7 | 1,6 | 4,1 | 0,7 | 3,1 | 0,7 | 5,3 | 0,1 | 3,5 | 0,5 | 40,9 | 19,0 | 35,6 | 17,1 |
| 74 | 15,7 | 5,4 | 7,8 | 2,5 | 8,0 | 2,9 | 5,7 | 2,0 | 5,7 | 1,7 | 4,8 | 2,4 | 5,6 | 1,8 | 4,0 | 1,3 | 5,7 | 2,5 | 4,3 | 2,1 | 4,0 | 0,7 | 3,0 | 0,8 | 5,1 | 0,2 | 3,3 | 0,5 | 39,7 | 18,6 | 34,4 | 16,7 |
| 75 | 15,1 | 5,2 | 7,5 | 2,3 | 7,9 | 2,9 | 5,5 | 1,9 | 5,6 | 1,8 | 4,6 | 2,4 | 5,3 | 1,7 | 3,7 | 1,3 | 7,4 | 2,8 | 5,6 | 2,5 | 3,7 | 0,7 | 2,6 | 0,7 | 4,7 | 0,0 | 2,9 | 0,4 | 39,3 | 18,6 | 34,0 | 16,7 |
| 76 | 14,5 | 5,1 | 7,6 | 2,4 | 7,8 | 2,9 | 5,3 | 1,8 | 5,4 | 1,7 | 4,3 | 2,2 | 5,2 | 1,7 | 3,6 | 1,3 | 7,2 | 2,6 | 5,4 | 2,5 | 3,5 | 0,8 | 2,5 | 0,8 | 4,3 | 0,1 | 2,7 | 0,5 | 38,5 | 18,4 | 33,1 | 16,4 |
| 77 | 16,6 | 5,2 | 8,0 | 2,3 | 7,6 | 2,8 | 5,1 | 1,7 | 5,0 | 1,8 | 4,1 | 2,2 | 4,9 | 1,6 | 3,3 | 1,2 | 6,8 | 3,0 | 5,1 | 2,8 | 3,3 | 0,8 | 2,3 | 0,7 | 4,1 | 0,1 | 2,5 | 0,5 | 37,8 | 18,3 | 32,4 | 16,2 |
| 78 | 15,9 | 5,1 | 8,7 | 2,6 | 7,4 | 2,8 | 4,9 | 1,7 | 5,2 | 1,8 | 3,8 | 2,1 | 4,7 | 1,6 | 3,1 | 1,2 | 6,5 | 2,8 | 5,0 | 2,8 | 3,7 | 0,8 | 2,6 | 0,9 | 3,7 | 0,1 | 2,2 | 0,4 | 37,4 | 18,3 | 32,0 | 16,1 |
| 79 | 15,4 | 4,9 | 8,5 | 2,6 | 7,2 | 2,7 | 4,8 | 1,6 | 4,9 | 1,8 | 3,5 | 2,1 | 4,5 | 1,6 | 2,9 | 1,2 | 6,2 | 2,9 | 4,8 | 2,9 | 4,4 | 0,0 | 3,4 | 0,0 | 3,5 | 0,1 | 2,1 | 0,5 | 36,3 | 17,8 | 30,9 | 15,6 |
| 80 | 14,7 | 4,7 | 7,7 | 2,3 | 9,0 | 2,4 | 5,9 | 1,0 | 4,5 | 1,9 | 3,4 | 2,0 | 4,2 | 1,5 | 2,6 | 1,1 | 5,9 | 3,1 | 4,6 | 3,0 | 4,1 | 0,0 | 3,0 | 0,0 | 3,2 | 0,1 | 2,1 | 0,2 | 35,9 | 17,8 | 30,5 | 15,6 |
| 81 | 14,1 | 4,6 | 6,4 | 2,1 | 8,8 | 2,3 | 5,7 | 1,0 | 4,5 | 1,8 | 3,1 | 1,9 | 4,1 | 1,5 | 2,5 | 1,2 | 5,7 | 3,0 | 4,5 | 3,0 | 4,0 | 0,0 | 2,9 | 0,0 | 3,1 | 0,1 | 2,0 | 0,2 | 35,0 | 17,4 | 29,7 | 15,3 |
| 82 | 13,7 | 4,4 | 6,2 | 1,8 | 8,5 | 2,2 | 5,5 | 0,8 | 4,8 | 2,2 | 3,2 | 2,3 | 3,8 | 1,4 | 2,2 | 1,1 | 5,4 | 3,2 | 4,3 | 3,2 | 3,8 | 0,0 | 2,6 | 0,0 | 2,9 | 0,1 | 1,8 | 0,2 | 34,3 | 17,2 | 29,0 | 15,0 |
| 83 | 13,5 | 4,5 | 7,6 | 2,6 | 8,4 | 2,2 | 5,3 | 0,8 | 4,4 | 2,1 | 3,0 | 2,1 | 4,2 | 1,7 | 2,6 | 1,3 | 5,2 | 3,2 | 4,2 | 3,2 | 3,6 | 0,0 | 2,4 | 0,0 | 2,5 | 0,1 | 1,6 | 0,2 | 34,1 | 17,2 | 28,7 | 15,0 |
| 84 | 13,3 | 4,5 | 7,3 | 2,5 | 8,1 | 2,0 | 5,2 | 0,7 | 4,2 | 2,1 | 2,8 | 2,1 | 6,9 | 0,7 | 4,5 | 1,5 | 5,0 | 3,2 | 4,1 | 3,2 | 3,5 | 0,0 | 2,3 | 0,0 | 2,3 | 0,0 | 1,3 | 0,0 | 33,0 | 16,7 | 27,7 | 14,5 |
| 85 | 12,5 | 4,0 | 5,4 | 1,5 | 7,9 | 2,0 | 5,0 | 0,6 | 4,8 | 2,4 | 3,3 | 2,5 | 6,5 | 1,0 | 4,2 | 1,7 | 4,8 | 3,3 | 4,0 | 3,3 | 3,2 | 0,0 | 2,0 | 0,0 |     |     |     |     | 32,7 | 16,6 | 27,4 | 14,4 |
| 86 | 12,2 | 4,1 | 6,1 | 2,0 | 7,6 | 2,0 | 4,9 | 0,5 | 4,5 | 2,2 | 3,0 | 2,3 | 6,4 | 1,1 | 4,1 | 1,8 | 4,6 | 3,2 | 3,8 | 3,2 | 3,1 | 0,0 | 1,9 | 0,0 |     |     |     |     | 32,1 | 16,3 | 26,6 | 14,1 |
| 87 | 11,8 | 3,8 | 6,4 | 2,3 | 7,4 | 1,8 | 4,7 | 0,4 | 4,3 | 2,2 | 2,9 | 2,2 | 5,9 | 1,6 | 3,8 | 2,1 | 7,7 | 0,0 | 7,1 | 0,0 | 2,9 | 0,0 | 1,7 | 0,0 |     |     |     |     | 31,5 | 16,1 | 26,0 | 13,8 |
| 88 | 11,2 | 3,5 | 4,4 | 1,4 | 7,3 | 1,9 | 4,5 | 0,4 | 3,8 | 2,1 | 2,6 | 2,0 | 5,8 | 1,6 | 3,7 | 2,2 | 7,4 | 0,0 | 6,9 | 0,0 | 2,7 | 0,0 | 1,5 | 0,0 |     |     |     |     | 31,4 | 16,0 | 25,7 | 13,8 |
| 89 | 11,0 | 3,5 | 4,4 | 1,4 | 7,0 | 1,7 | 4,3 | 0,3 | 4,7 | 2,5 | 3,1 | 2,6 | 5,6 | 1,9 | 3,6 | 2,3 | 7,3 | 0,0 | 6,8 | 0,0 | 2,6 | 0,0 | 1,4 | 0,0 |     |     |     |     | 30,7 | 15,3 | 24,8 | 13,3 |
| 90 | 10,2 | 3,2 | 4,7 | 1,6 | 6,9 | 1,7 | 4,1 | 0,2 | 6,3 | 2,5 | 4,4 | 3,6 | 5,3 | 2,2 | 3,4 | 2,4 | 7,2 | 0,0 | 6,7 | 0,0 | 2,3 | 0,0 | 1,2 | 0,0 |     |     |     |     | 30,7 | 15,1 | 24,5 | 13,2 |
| 91 | 9,9  | 3,2 | 3,9 | 1,3 | 6,7 | 1,6 | 4,0 | 0,2 | 7,9 | 0,0 | 7,2 | 0,0 | 5,2 | 2,2 | 3,3 | 2,3 | 6,9 | 0,0 | 6,4 | 0,0 | 2,2 | 0,0 | 1,1 | 0,0 |     |     |     |     | 32,9 | 13,5 | 23,9 | 12,9 |
| 92 | 9,4  | 3,1 | 5,2 | 2,1 | 6,4 | 1,5 | 3,7 | 0,1 | 7,7 | 0,0 | 7,1 | 0,0 | 4,9 | 2,5 | 3,1 | 2,4 | 6,9 | 0,0 | 6,4 | 0,0 | 2,0 | 0,0 | 1,0 | 0,0 |     |     |     |     | 34,4 | 12,8 | 23,3 | 12,6 |
| 93 | 8,9  | 2,9 | 4,8 | 2,1 | 6,3 | 1,5 | 3,6 | 0,1 | 6,9 | 0,0 | 6,3 | 0,0 | 7,4 | 0,0 | 5,4 | 0,0 | 6,6 | 0,0 | 6,0 | 0,0 | 1,9 | 0,0 | 0,9 | 0,0 |     |     |     |     | 54,4 | 0,0  | 43,0 | 0,0  |
| 94 | 8,7  | 2,9 | 4,5 | 1,8 | 6,0 | 1,4 | 3,4 | 0,1 | 6,5 | 0,0 | 6,0 | 0,0 | 7,4 | 0,0 | 5,1 | 0,0 | 6,5 | 0,0 | 5,9 | 0,0 | 1,8 | 0,0 | 0,8 | 0,0 |     |     |     |     | 52,4 | 0,0  | 44,6 | 0,0  |
| 95 | 8,1  | 2,7 | 4,3 | 1,9 | 5,9 | 1,4 | 3,2 | 0,2 | 6,2 | 0,0 | 5,7 | 0,0 | 7,4 | 0,0 | 5,1 | 0,0 | 6,3 | 0,0 | 5,8 | 0,0 |     |     |     |     |     |     |     |     | 52,2 | 0,0  | 42,7 | 0,0  |
| 96 | 7,8  | 2,6 | 3,2 | 1,2 | 5,7 | 1,3 | 3,1 | 0,3 | 5,4 | 0,0 | 4,9 | 0,0 | 7,2 | 0,0 | 4,7 | 0,0 | 6,0 | 0,0 | 5,4 | 0,0 |     |     |     |     |     |     |     |     | 50,9 | 0,0  | 41,6 | 0,0  |
| 97 | 5,1  | 1,5 | 2,4 | 1,7 | 5,5 | 1,3 | 2,9 | 0,4 | 5,3 | 0,0 | 4,7 | 0,0 | 6,8 | 0,0 | 4,6 | 0,0 | 5,9 | 0,0 | 5,3 | 0,0 |     |     |     |     |     |     |     |     | 50,2 | 0,0  | 40,6 | 0,0  |







**Table S8. Data used to show the gene expression profile of *S. mutans* biofilms after topical treatments.** The fold-change is relative to vehicle-treated biofilms. Data presented are median and interquartile range are shown for genes *gtfB*, *gtfC*, *IrgA*, and *SMU.775*, while mean and standard deviation for genes *dltB*, *dltD*, *atpD*, and *nox1*: data shown in Figure 10

|                |                | Myr    | 1771   | Myr+1771+ F | F      | V     |
|----------------|----------------|--------|--------|-------------|--------|-------|
| <i>gtfB</i>    | Minimum        | 0,5000 | 0,6100 | 0,3600      | 0,3300 | 1,000 |
|                | 25% Percentile | 0,5750 | 0,6600 | 0,4100      | 0,4000 | 1,000 |
|                | Median         | 0,6300 | 0,8300 | 0,5700      | 0,4950 | 1,000 |
|                | 75% Percentile | 0,7450 | 0,9550 | 0,7325      | 1,098  | 1,000 |
|                | Maximum        | 1,070  | 1,550  | 0,9000      | 1,410  | 1,000 |
| <i>gtfC</i>    | Minimum        | 0,3400 | 0,3400 | 0,4400      | 0,6700 | 1,000 |
|                | 25% Percentile | 0,3800 | 0,4775 | 0,4925      | 0,7100 | 1,000 |
|                | Median         | 0,4500 | 0,7950 | 0,6200      | 0,8000 | 1,000 |
|                | 75% Percentile | 0,7100 | 0,8400 | 0,7650      | 0,9250 | 1,000 |
|                | Maximum        | 0,7300 | 0,9000 | 0,7700      | 1,000  | 1,000 |
| <i>IrgA</i>    | Minimum        | 0,9600 | 0,7500 | 1,050       | 1,860  | 1,000 |
|                | 25% Percentile | 0,9900 | 1,038  | 1,223       | 1,980  | 1,000 |
|                | Median         | 1,050  | 1,170  | 2,375       | 2,400  | 1,000 |
|                | 75% Percentile | 1,178  | 1,593  | 2,618       | 3,185  | 1,000 |
|                | Maximum        | 1,230  | 2,590  | 3,010       | 3,620  | 1,000 |
| <i>SMU.775</i> | Minimum        | 0,4400 | 0,5700 | 1,080       | 1,020  | 1,000 |
|                | 25% Percentile | 0,5000 | 0,7775 | 1,155       | 1,133  | 1,000 |
|                | Median         | 0,8000 | 0,9900 | 1,275       | 1,245  | 1,000 |
|                | 75% Percentile | 0,9675 | 1,205  | 1,590       | 1,428  | 1,000 |
|                | Maximum        | 1,190  | 1,440  | 1,920       | 2,010  | 1,000 |
| <i>dltB</i>    | Mean           | 0,8320 | 0,8525 | 0,9783      | 0,8692 | 1,000 |
|                | Std. Deviation | 0,2086 | 0,2701 | 0,2954      | 0,2469 | 0,000 |
| <i>dltD</i>    | Mean           | 0,7217 | 0,8975 | 0,9025      | 0,9213 | 1,000 |
|                | Std. Deviation | 0,1922 | 0,1827 | 0,3173      | 0,1895 | 0,000 |
| <i>atpD</i>    | Mean           | 0,8900 | 0,8967 | 0,8600      | 0,7973 | 1,000 |
|                | Std. Deviation | 0,1782 | 0,1502 | 0,1843      | 0,1416 | 0,000 |
| <i>nox1</i>    | Mean           | 0,9580 | 1,027  | 0,8842      | 0,8058 | 1,000 |
|                | Std. Deviation | 0,2417 | 0,2004 | 0,2734      | 0,1656 | 0,000 |

**Table S9. Cell viability of keratinocytes NOK-si after exposure to treatments. The percentage of cell viability was obtained considering the cell viability control (Cont L) as 100%: data shown in Figure 11.**

|                | Myr   | 1771  | Myr+1771 | Myr+F | 1771+F | Myr+1771+ F | F     | V     | Cont L | Cont D |
|----------------|-------|-------|----------|-------|--------|-------------|-------|-------|--------|--------|
| Mean           | 84,94 | 96,93 | 80,09    | 75,26 | 91,69  | 80,34       | 87,39 | 99,09 | 100,0  | 11,75  |
| Std. Deviation | 6,392 | 7,278 | 6,905    | 5,458 | 9,494  | 13,91       | 9,745 | 3,389 | 6,385  | 1,171  |
